# **CHiCAGO: Robust Detection of DNA Looping Interactions in Capture Hi-C data**

Jonathan Cairns<sup>1,\*</sup> (jonathan.cairns@babraham.ac.uk),  
 Paula Freire-Pritchett<sup>1,\*</sup> (paulafp@babraham.ac.uk),  
 Steven W. Wingett<sup>1,2</sup> (steven.wingett@babraham.ac.uk),  
 Andrew Dimond<sup>1</sup> (andrew.dimond@babraham.ac.uk),  
 Vincent Plagnol<sup>3</sup> (v.plagnol@ucl.ac.uk),  
 Daniel Zerbino<sup>4</sup> (zerbino@ebi.ac.uk),  
 Stefan Schoenfelder<sup>1</sup> (stefan.schoenfelder@babraham.ac.uk),  
 Biola-Maria Javierre<sup>1</sup> (biola-maria.javierre@babraham.ac.uk),  
 Cameron Osborne<sup>5</sup> (cameron.osborne@kcl.ac.uk),  
 Peter Fraser<sup>1</sup> (peter.fraser@babraham.ac.uk),  
 Mikhail Spivakov<sup>1,§</sup> (spivakov@babraham.ac.uk).

<sup>1</sup>Nuclear Dynamics Programme, Babraham Institute, Cambridge UK

<sup>2</sup>Bioinformatics Group, Babraham Institute, Cambridge UK

<sup>3</sup>UCL Genetics Institute, London UK

<sup>4</sup>European Molecular Biology Laboratory, European Bioinformatics Institute, Cambridge UK

<sup>5</sup>Department of Medical and Molecular Genetics, King's College, London UK

\*Joint lead authors

§Corresponding author

## ABSTRACT

Capture Hi-C (CHi-C) is a state-of-the art method for profiling chromosomal interactions involving targeted regions of interest (such as gene promoters) globally and at high resolution. Signal detection in CHi-C data involves a number of statistical challenges that are not observed with other Hi-C-like techniques. We present a noise model and algorithms for background correction and multiple testing that are specifically adapted to CHi-C data. We implement these procedures in CHiCAGO (<http://regulatorygenomicsgroup.org/chicago>), an open-source package for robust interaction detection in CHi-C. We validate CHiCAGO by showing that promoter-interacting regions detected with it are enriched for regulatory features and disease-associated SNPs.

**Keywords:** gene regulation, nuclear organisation, promoter-enhancer interactions, Capture Hi-C, convolution noise model, p-value weighting.

## BACKGROUND

Chromosome Conformation Capture (3C) technology has revolutionised the analysis of nuclear organisation, leading to important insights into gene regulation [1]. While the original 3C protocol tested interactions between a single pair of candidate regions ("one vs one"), subsequent efforts focused on increasing the throughput of this technology (4C, "one vs all"; 5C, "many vs many"), culminating in the development of Hi-C, a method that interrogated the whole nuclear interactome ("all vs all") [1, 2]. The extremely large number of possible pairwise interactions in Hi-C samples, however, imposes limitations on the realistically achievable sequencing depth at individual interactions, leading to reduced sensitivity. The recently-developed Capture Hi-C (CHi-C) technology uses sequence capture to enrich Hi-C material for multiple genomic regions of interest (hereafter referred to as "baits"), making it possible to profile the global interaction profiles of many thousands of regions globally ("many vs all") and at a high resolution (**Fig. 1**) [3-7].

CHi-C data possess a number of statistical properties that set them apart from other 3C/4C/Hi-C-like methods. First, in contrast to traditional Hi-C or 5C, baits in CHi-C comprise a subset of restriction fragments, while any fragment in the genome can be detected on the "other end" of an interaction. This asymmetry of CHi-C interaction matrices is not accounted for by the normalisation procedures developed for traditional Hi-C and 5C [8-10]. Secondly, CHi-C baits, but not other ends, have an additional source of bias associated with uneven capture efficiency. In addition, the need for detecting interactions globally and at a single-fragment resolution creates specific multiple testing challenges that are less pronounced with binned Hi-C data or the more focused 4C and 5C assays, which involve fewer fragment pairs tested for interaction. Finally, CHi-C designs such as Promoter CHi-C and HiCap [3-5, 11] involve large numbers (many thousands) of spatially dispersed baits. This presents the opportunity to increase the robustness of signal detection by sharing information across baits. Such sharing is impossible in the analysis of 4C data that focuses on only a single bait, and is of limited use in 4C-seq containing a small number of baits [12, 13].

These distinct features of CHi-C data have prompted us to develop a bespoke statistical model and a background correction procedure for detecting significant interactions in CHi-C data at a single restriction fragment resolution. The algorithm, termed CHiCAGO ("Capture

Hi-C Analysis Of Genomic Organisation"), is presented here and implemented as an open-source R package. CHiCAGO features a novel background correction procedure and a two-component convolution noise model accounting for both real, but expected interactions, as well as assay and sequencing artefacts. In addition, CHiCAGO implements a weighted false discovery control procedure that builds on the theoretical foundations of Genovese *et al.* [14]. This procedure specifically accommodates the fact that increasingly larger numbers of tests are performed at regions where progressively smaller numbers of interactions are expected.

We demonstrate the efficacy of CHiCAGO on two datasets: one from the human lymphoblastoid cell line GM12878 [3] (see **Fig. 2** for examples) and another from mouse embryonic stem cells [4]. We further show that CHiCAGO-detected interactions are enriched for regulatory regions and relevant disease-associated SNPs.

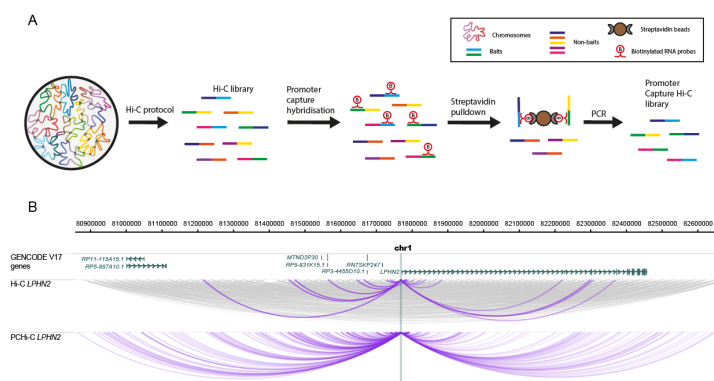

**Figure 1: The outline of Capture Hi-C.**

(A) Outline of the CHi-C protocol. A Hi-C library is hybridised to a capture system that consists of biotinylated RNA probes targeting DNA fragment ends of gene promoters. After hybridization, streptavidin pulldown is performed to filter for fragments that have hybridized with the RNA probes, leading to enrichment in baited fragments ("baits"). Following a limited-cycle PCR amplification, the promoter CHi-C library is ready to be analysed by massively parallel paired-end sequencing.

(B) The chromosomal interactome of the *LPHN2* promoter region in GM12878 cells. The top panel shows a 1.8Mb region containing the *LPHN2* gene. The middle panel, shows raw read-pairs from the Hi-C library. All read pairs sequenced for these regions are shown in grey. In purple, we show only the read-pairs that contain the *LPHN2* promoter in one of the fragment ends. The bottom panel shows raw read-pairs from the Promoter CHi-C library. The WashU EpiGenome Browser [15, 16] was used to create this figure.

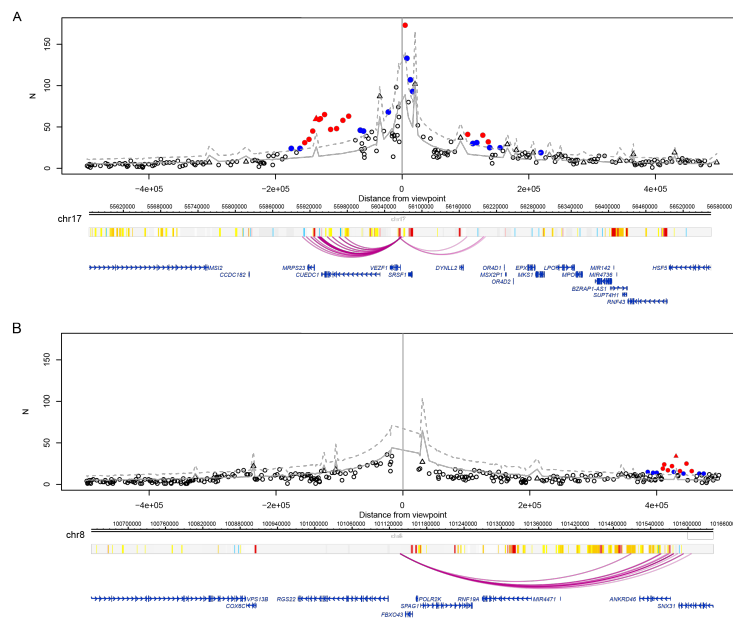

**Figure 2: Examples of interactions called by CHiCAGO.**

Top panels: Plots showing the read counts from bait-other end pairs within 500 kb (upstream and downstream) of two baits, containing the promoters of (A) *VEZF1* and (B) *RGS22* in GM12878 cells. Significant interactions detected by CHiCAGO (score  $\geq 5$ ) are shown in red, and sub-threshold interactions ( $3 \leq \text{score} < 5$ ) are shown in blue. Triangles indicate bait-to-bait interactions. Grey lines show expected counts and dashed lines the upper bound of the 95% confidence intervals. (Note that bait-to-bait interactions have higher expected read counts than bait-to-non-bait interactions spanning the same distance). Bottom panels: the genomic maps of the corresponding regions, with coloured bars showing “chromatin colours” obtained from performing chromatin segmentation with chromHMM [17]: red – active promoter; pink – poised/repressed promoter; orange – strong enhancer; yellow – weak enhancer; blue – insulator.

## RESULTS

### Methodological foundations of CHiCAGO

#### *A convolution noise model for HiC data*

The background signals in CHi-C decrease as the genomic distance between the bait and other end increases (**Fig. 3**), as in other 3C/HiC-like methods [6-10, 12, 13, 18, 19]. It is generally accepted that this effect reflects the reduction in the frequency of random collisions between genomic fragments owing to constrained Brownian motion, in a manner consistent with molecular dynamics simulations [20]. We model this “Brownian noise” as a negative binomial random variable whose expected levels are a function of genomic distance with further adjustment for bias resulting from the properties of individual fragments.

In addition to Brownian motion, noise in CHi-C is generated by assay artefacts, such as sequencing errors. We model this “technical noise” component as a Poisson random variable whose mean depends on the properties of interacting fragments, but is independent of genomic distance between them.

We further assume that these two sources of noise are independent. Therefore, the combined noise estimate can be obtained from a convolution of negative binomial (Brownian noise) and Poisson distributions (technical noise) that is known as the Delaporte distribution.

We construct a background distribution from the data in a robust way, and then find fragment pairs with read counts that greatly exceed the expected background distribution (**Fig. 2**; as described in the next section). The full mathematical specification of the algorithm is given in **Additional file 1**.

### **Background estimation in asymmetrical interaction matrices**

A practical advantage of the two-component noise model is that the Brownian and technical normalisation factors can be estimated on separate subsets of data, where only one noise component is prevalent.

The dependence of noise levels on the distance between fragments is particularly apparent at relatively short genomic distances (up to ~1-2Mb), where the observed read counts considerably exceed those observed at longer ranges and for trans-chromosomal interactions. Thus, within this range, the Brownian noise largely dominates the technical noise, and thus can be estimated while ignoring the latter component. By borrowing information across all interactions in this distance range, we can infer Brownian noise parameters precisely (**Fig. 4 and Suppl. Fig. 1 in Additional file 2**). We follow Imakaev *et al.* [8] in assuming that fragment-level biases have a multiplicative effect on the expected read counts for each fragment pair. However we estimate “bait-specific” and “other end-specific” bias factors differently, accounting for the asymmetry of CHi-C interaction matrices.

The bait-specific factors reflect the technical biases of both HiC and sequence capture, as well as local effects such as chromatin accessibility. We estimate these factors in a way that is robust to the presence of a small fraction of interactions in the data. **Fig. 4A** provides examples of three baits with very diverse bias factors, illustrating that local read enrichment correlates with the bias factor.

Estimating other end-specific bias factors poses a challenge, as the majority of interactions are removed at the capture stage that enriches for only a small subset of interactions with baits. We assume that the overall fragment-level read count corresponding to trans-chromosomal pairs primarily reflects the general “noisiness” of a fragment (a similar approach has been taken independently in Dryden *et al.* [6]). We therefore pool fragments according to this property and estimate bias factors for each pool. As expected, noise levels are stronger for fragments associated with higher numbers of trans-chromosomal read pairs (**Fig. 4C**). Similarly, baits detected at the “other ends” of bait-to-bait pairs had higher levels of noise than non-baits, as expected given the preferential recovery of “double-baited” ligation products at the capture stage.

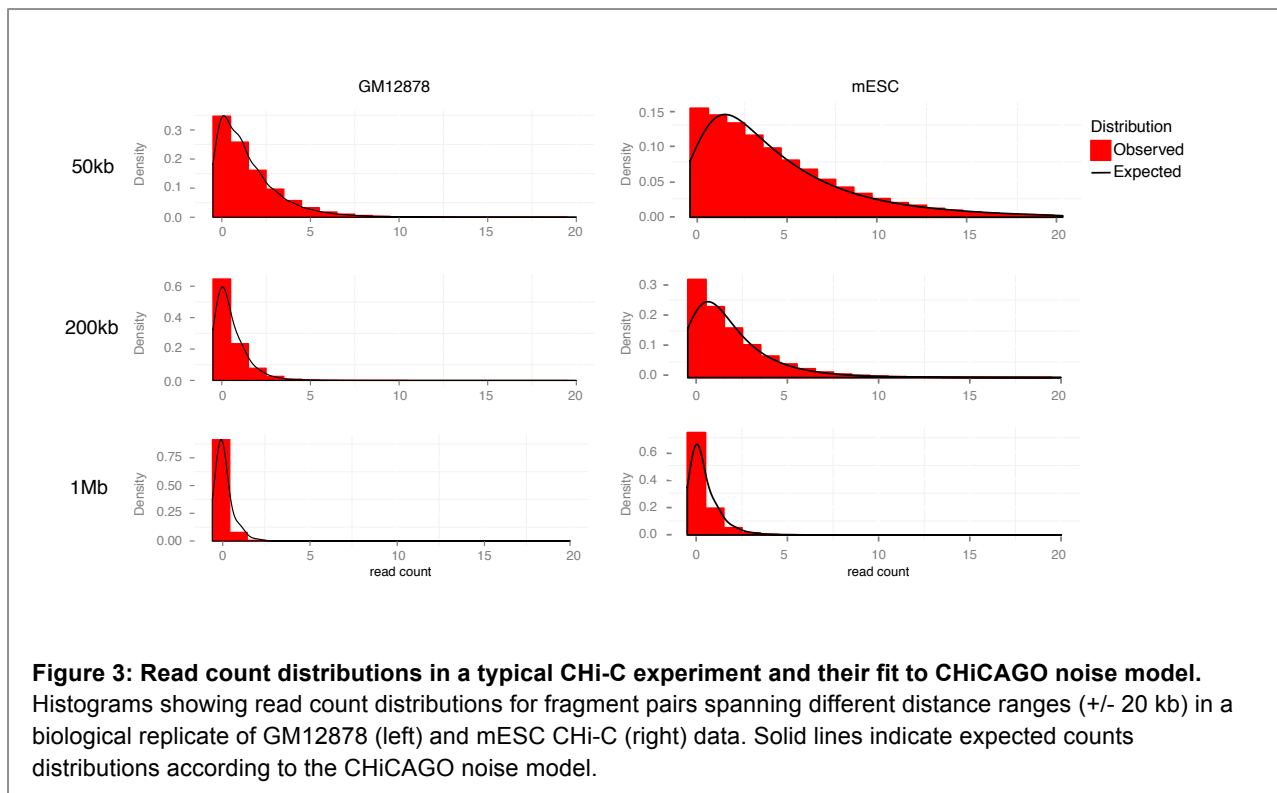

In parallel, we compute the dependence of the Brownian noise on distance (plotted in **Fig. 4B** for GM12878 CHi-C data). It can be seen that this dependence approximately follows a piecewise power law, consistent with previous studies on the subject, both theoretical and experimental [20, 21].

To estimate the magnitude of technical noise, we use trans-chromosomal read pairs (see Methods), as the expected frequency of true trans-chromosomal looping interactions is low, and the level of the Brownian noise between chromosomes is assumed negligible. Indeed, as we see in **Fig. 4D**, the expected level of technical noise is typically a small fraction of a count.

Having estimated the parameters of both Brownian and technical noise, we combine them into the Delaporte distribution. After appropriate normalisation and bias correction, we detect fragment pairs showing read coverage higher than expected under the Delaporte assumptions with a one-tailed hypothesis test.

### **Weighted multiple testing correction for Capture HiC**

For a typical mammalian genome, we test billions of hypotheses – one for each possible bait-other end pair. As a result, the p-values must be corrected to account for multiple testing. Standard multiple testing procedures assume that interactions are equally likely at all distances. However, in CHi-C data, we perform far more tests to verify the significance of interactions at large distances, where we would expect considerably fewer true interaction events. Consistent with this, the use of a single p-value threshold leads to results that consist mostly of erroneous distal and trans-chromosomal counts (**Fig. 5B-C**).



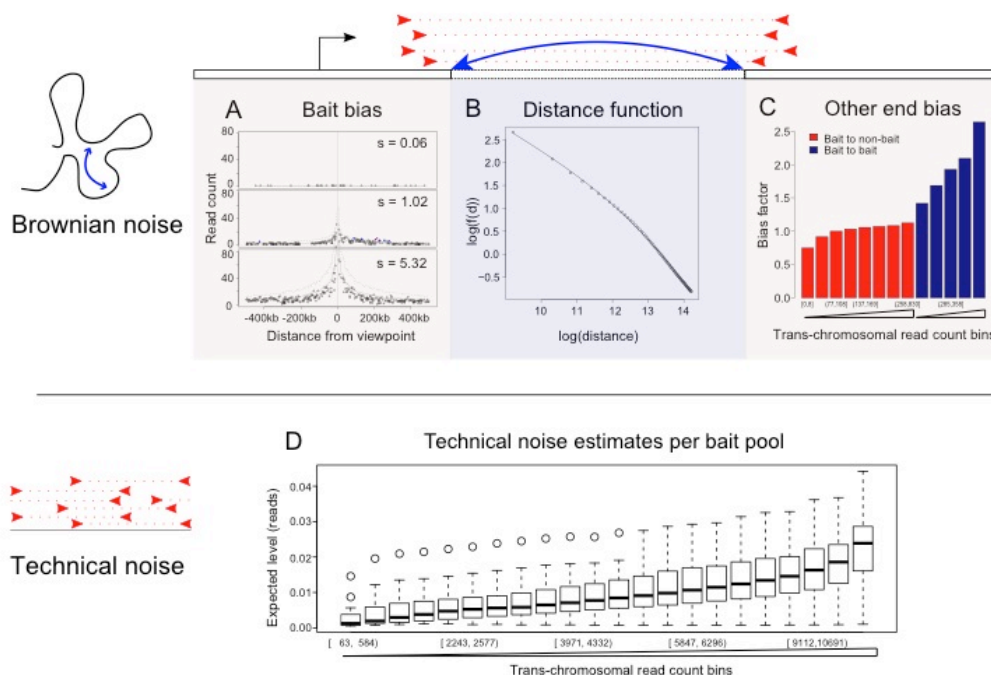

**Figure 4: Sources of noise and bias accounted for by the CHiCAGO model, illustrated with GM12878 data.**

(A-C) represent different factors modelled by Brownian noise: (A) multiplicative bait-specific bias (shown are three representative distance profiles for three different values of the bait-specific bias factor); (B) distance dependency, plotted on a log-log scale; (C) multiplicative other-end bias (each bar represents a pool of other ends defined by a range of trans-chromosomal read pairs accumulated by each other end; bait-to-bait interactions are pooled separately). (D) Technical noise is estimated separately for each combination of bait and other-end pools, each of which is defined by the number of accumulated trans-chromosomal read pairs. Here, we plot all technical noise factors for each bait pool, showing the distribution of technical noise levels observed for its interactions with all respective other-end pools.

To address this issue, the long-range and trans-chromosomal interaction tests need to be more stringent than the short-range ones. We achieve this with an approach based on p-value weighting [14, 22]. This procedure permits a smooth change of behaviour with distance, thereby bypassing the need to choose a hard distance threshold. Briefly, we assign each fragment pair a weight, estimating how probable it is that the fragments interact. The weights are then used to adjust the p-values (see **Additional file 1** for full specification). P-value weighting can be seen as a simplified version of the empirical Bayesian treatment, with weights related to prior probabilities. One practical advantage of this method for our framework is that it avoids the need to make specific assumptions about the read count distribution of true interactions, which would be required for computing Bayes factors.

The optimal choice of weights depends on the relative abundance of true positives at each bait–other end distance. We estimate this abundance by assessing reproducibility across samples and fitting a bounded logistic curve to the observed reproducibility levels at different distances. As the weights reflect only the distance profiles of true interactions, we expect them to be generally independent of specific cell type and organism (given comparable genome sizes). Indeed, generally similar weight profiles were obtained in GM12878 and mESC cells (**Fig. 5A** and **Suppl. Fig. 2A in Additional file 2**). This is consistent with our expectation that weights are largely independent of specific cell type and organism given

comparable genome sizes, as they predominantly reflect the overall distance distribution of true interactions. The emerging multi-replicate CHi-C datasets will further refine our weight estimates and assess their dependence on the particulars of the model system.

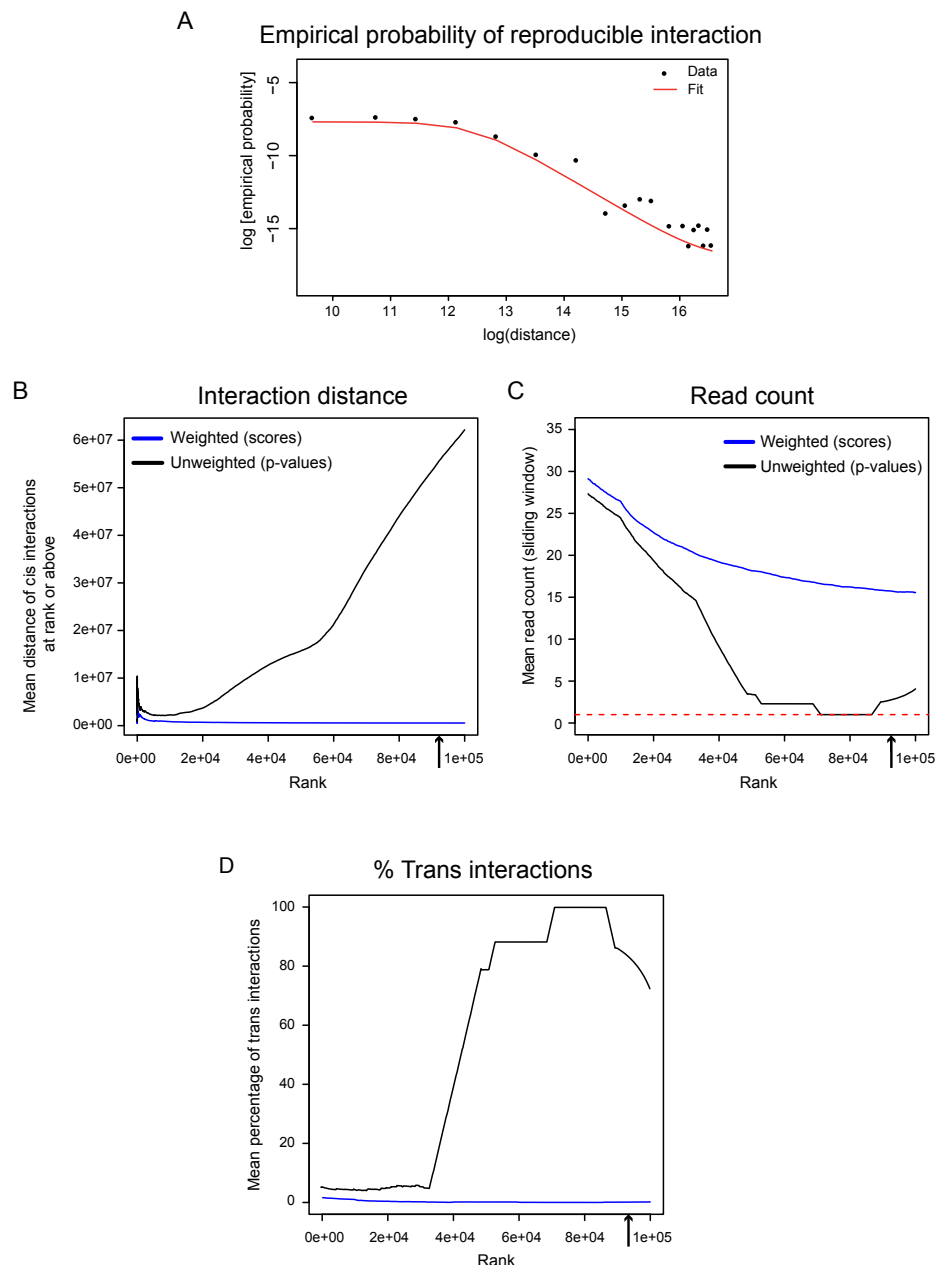

**Figure 5: CHiCAGO multiple testing approach schematic.**

(A) Empirical probability of reproducible interaction (used to generate weight profiles) as a function of interaction distance, generated on two replicates of GM12878 cells. (B-D) The effects of applying p-value weighting to the GM12878 data. The arrow on the x-axis indicates the number of significant interactions called in the weighted data. Upon applying weighting we see a decrease in the interaction distance amongst cis-interactions (B). P-value weighting increases the mean read count of called interactions (C) and decreases the prevalence of trans-chromosomal interactions (D).



We illustrate the impact of the weighting procedure on GM12878 and mESC CHi-C data by comparing the properties of the 100,000 top-scoring interactions, called either with or without weighting. The reproducibility of interaction calls decreases with bait–other end distance (**Fig. 5A** and **Suppl. Fig. 2A in Additional file 2**). As a result, the “weighted” significant interactions generally span a much shorter range than the unweighted ones (**Fig. 5B** and **Suppl. Fig. 2B in Additional file 2**). This is consistent with the biological expectation that promoter-interacting regions, such as enhancers, are enriched in the relative vicinity of their targets. Another consequence of the weighting procedure is that the average read count is much higher in the weighted calls (**Fig. 5C** and **Suppl. Fig. 2C in Additional file 2**). Strikingly, many of the unweighted calls are based on only one read pair per interaction. As the vast majority of fragment pairs attract no reads at all, low p-values for single-read-pair interactions are expected. However, due to the very large number of possible fragment pairs (approximately 18.5 billion in both the GM12878 and the mESC data), we still expect thousands of single-read-count calls to be generated by technical noise. These spurious calls, the majority of which correspond to trans-chromosomal pairs (**Fig. 5D** and **Suppl. Fig. 2D in Additional file 2**), are generally non-reproducible and are therefore excluded by the weighting procedure.

In conclusion, the p-value weighting procedure implemented in CHiCAGO provides a multiple testing treatment that accounts for the differences in true positive rates at different bait–other end distances, thus improving the reproducibility of interaction calls.

### **Promoter interactions detected by CHiCAGO: validation and key properties**

We validated CHiCAGO by assessing the functional properties of significant interactions detected with it in human GM12878 [3] and mouse ES cells [4]. **Table 1** displays summary statistics for each sample, showing the generally similar numbers of detected significant interactions, both overall and per bait, despite the differences in the organism and cell type between them.

### ***Enrichment of promoter-interacting fragments for regulatory features***

We first assessed the enrichment of promoter-interacting fragments for histone marks associated with active (H3K4me1, H3K4me3, H3K27ac) and repressed (H3K27me3, H3K9me3) chromatin, as well as for the binding sites of CTCF that has a well-established role in shaping nuclear architecture [23]. To this end, we compared the observed and expected numbers of significant other ends overlapping with these features. To estimate the expected degree of overlap, we drew multiple permutations of the promoter-other end pairs not detected as interacting, such that the overall distribution of their spanned distances matched that distribution for the true interactions.

**Fig. 6** shows the observed and expected numbers of CHiCAGO other ends (yellow and blue bars, respectively) that overlap with the regulatory features in GM12878 and mESCs (panels A and B, respectively; 95% confidence intervals are shown as error bars). Consistent enrichments over expected values were found for active histone marks (H3K4me1, H3K4me3, H3K27ac) in both cell types, in line with the expectation that looping interactions preferentially link promoters and remote regulatory regions such as enhancers. We also found that promoter-interacting fragments were strongly enriched for CTCF binding sites, as

previously reported [9, 23]. Interestingly, promoter-interacting fragments were also enriched for repressed chromatin marks, in particular for H3K27me3 in mESCs, supporting the role of Polycomb in shaping nuclear architecture in this cell type [5].

Assessing the enrichment of promoter-interacting fragments for known regulatory features can serve as a useful quality control for CHi-C samples. To this end, CHiCAGO automatically generates enrichment barplots similar to **Fig. 6** for each sample, integrating interaction calls with user-specified ChIP data.

**Table 1. The properties of CHiCAGO-detected interactions in GM12878 human LCLs and mouse ES cells (mESC)**

|                                                  | GM12878                                                | mESC                               |
|--------------------------------------------------|--------------------------------------------------------|------------------------------------|
| Number of captured baits                         | 22076                                                  | 22459                              |
| Total number of unique captured read pairs       | Rep 1: 46542745<br>Rep 2: 118813226<br>Rep 3: 73881698 | Rep 1: 59963697<br>Rep 2: 82026534 |
| Number of significant interactions               | 92457                                                  | 81459                              |
| Mean number of significant interactions per bait | 4.19                                                   | 3.63                               |
| Median distance of cis-chromosomal interactions  | 173926 bp                                              | 255330 bp                          |

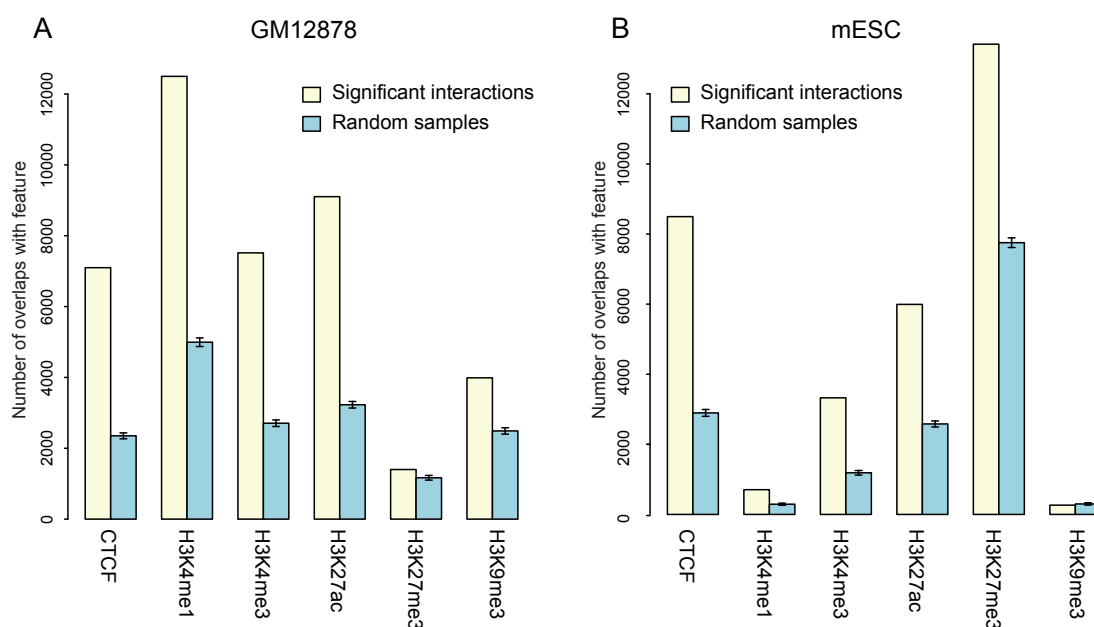

**Figure 6: Chromatin features of promoter-interacting fragments detected using CHiCAGO.**

Yellow bars indicate overlaps with cis-interacting fragments at 1Mb distance from baits; blue bars indicate expected overlap values based on 100 random subsets of *HindIII* fragments. These subsets selected to have a similar distribution of distances from gene promoters as the interacting fragments. (A) GM12878 CHi-C data. Chromatin features are obtained from the ENCODE project [24]; (B) mESC CHi-C data. Chromatin features are obtained from the mouse ENCODE project [25]. These plots are generated automatically by the CHiCAGO pipeline.

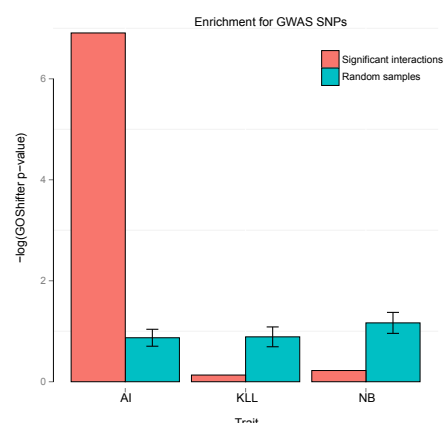

**Figure 7: Significant enrichment for GWAS SNPs at CHiCAGO-detected interactions in human lymphoblastoid cells.**

Enrichment for SNPs associated with autoimmune immune diseases (AI), kidney/liver/lung (KLL) and neurological behaviour (NB) disorders [26] in the CHiCAGO-detected interactions in the GM12878 cell line. The barplot shows p-values for the enrichment of each disorder; red bars indicate p-values computed in interacting-fragments; blue bars indicate p-values computed in 100 random subsets of HindIII fragments selected to have a similar distribution of distances from gene promoters as the interacting fragments. This analysis was performed using the software package GoShifter (Genomic Annotation Shifter, [27]).

### Enrichment for GWAS SNPs

Disease-associated SNPs identified in genome-wide association studies (GWAS) preferentially localise to non-coding regulatory regions, away from annotated promoters, posing a significant challenge in identifying their putative target genes [26]. We asked whether promoter-interacting regions detected by CHiCAGO in human cells are enriched for GWAS SNPs, which would potentially reflect their presence in long-range regulatory sequences and thus suggest a putative functional role in disease.

We assessed the enrichment of promoter-interacting regions in the GM12878 lymphoblastoid cells for sets of GWAS catalogue SNPs from Maurano *et al.* [26]. These sets reflect the grouping of GWAS traits into broader categories, such as autoimmune disease (AI), neurological/behavioural traits (NB) and kidney/liver/lung disorders (KLL). We used the software package GoShifter (Genomic annotation Shifter, [27]) that infers the significance of overlap by locally shifting genomic annotations (in our case, the “other ends” of CHiCAGO-detected promoter interactions), thus reducing the effect of genomic biases and LD structure. We observed a significant enrichment of CHiCAGO “other ends” for SNPs associated with autoimmune diseases (GoShifter  $p=0.001$ ), but not with neurological/behavioural traits ( $p=0.801$ ) or kidney/liver/lung disorders ( $p=0.876$ ). This selective enrichment for autoimmune SNPs is consistent with GM12878 being a lymphocyte-derived cell line and replicates the original findings of Mifsud *et al.* [3].

We further confirmed that the enrichment for AI disease-associated SNPs was specific to promoter-interacting fragments. We used the same approach as in the previous section to generate 100 random samples of distance-matched “negative” (non-significant) interactions and tested the other ends of these interactions for SNP enrichment. The enrichment for AI-

associated SNPs was selectively observed in the “true”, but not in the “negative” set, and neither set was enriched for the NB- and KLL-associated SNPs (Fig. 7).

Taken together, these results demonstrate the power of using CHi-C data to link GWAS SNPs with their putative target genes in a cell-type-specific and high-throughput manner. We expect this to be one of the key applications of CHi-C in future clinical studies.

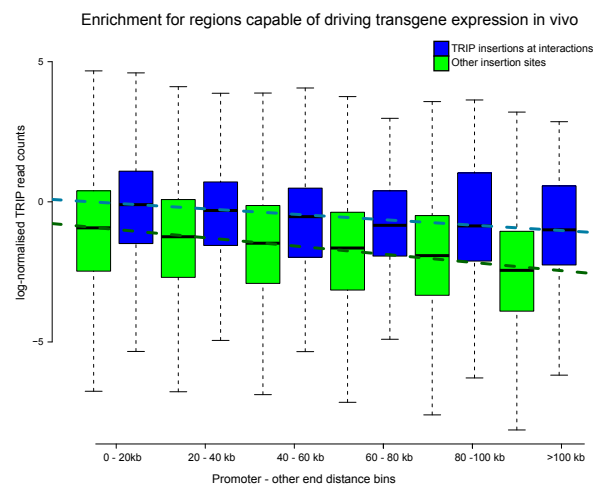

**Figure 8: Enrichment of promoter-interacting fragments for regions capable of driving transgene expression in mESCs.**

TRIP (Thousands of Reporters Integrated in Parallel) assesses the influence of local chromatin context on gene expression. This is achieved by integrating a barcoded transgene reporter into thousands of genomic locations in parallel and monitoring the transcriptional activity at each location [28]. Normalised RNA read counts from reporter insertions are separated according to (i) their overlap with *HindIII* fragments engaging or not in interactions; (ii) their promoter-other end distance. For non-interacting *HindIII* fragments, distance is measured from the nearest promoter in the linear sequence. Blue and green boxplots indicate read count summary statistics for promoter-interacting and non-interacting *HindIII* fragments, respectively. Each dashed line shows the regression of median log-normalised read counts against promoter-other end distance bin, considering promoter-interacting (blue) and non-interacting (green) *HindIII* fragments separately.

### **Capability to drive transgene expression in a high-throughput random integration experiment**

TRIP (Thousands of Reporters Integrated in Parallel) is a novel experimental technique to assess the influence of local chromatin context on gene expression. In TRIP analysis, a barcoded transgene reporter is integrated into thousands of genomic locations in parallel, and the transcriptional activity at each location is then monitored. Here we integrated the published TRIP analysis dataset in mESCs [28] with the CHiCAGO mESC calls [4], comparing the transcriptional activity at promoter-interacting regions with the activity elsewhere, over a range of genomic distances.

Consistent with the observation from the original TRIP study, we found that the distance from the nearest promoter was a strong determinant of transgene expression levels (Fig. 8). However, transgenes mapping to promoter-interacting fragments consistently showed higher expression levels across the whole range of genomic distances, as confirmed by linear



This expectation is supported by the observation that CHiCAGO-detected interactions are selectively enriched for regulatory chromatin features, even when located in regions with high background interaction levels.

While the conceptual interpretation of “significant” interactions is shared between CHiCAGO and algorithms developed for other types of 4C and HiC data, there are key differences in terms of the underlying noise model, the normalisation strategy and the multiple testing procedure.

Existing tools model Hi-C noise with a broad range of distributions, both discrete (binomial [18, 31], negative binomial [6]) and continuous (Weibull [7, 9], normal [13]). In CHiCAGO, we instead opted for a two-component convolution model combining two count distributions: a negative binomial and a Poisson. In doing so, we were motivated by the fact that random collisions and technical variability are two distinct noise-generating processes, whose properties are best learned separately on different subsets of data. Indeed, Brownian noise ostensibly dominates the signal at short distances, to the extent that technical variability is barely detectable. In contrast, at large linear distances between fragments, Brownian noise is too weak to be modelled adequately.

Borrowing information across baits to learn noise properties, as CHiCAGO does, requires careful normalisation across interactions. While Hi-C noise depends on a number of known parameters, such as fragment length and GC content [10], we, along with others [7, 8, 32], have opted to avoid any specific assumptions about noise structure, particularly given the increased complexity and asymmetric nature of capture Hi-C noise compared with conventional Hi-C. Assuming that interactions are subject to multiplicative bait- and other-end-specific bias, as we did in learning the Brownian noise component, parallels the assumptions of the Hi-C iterative correction approach by Imakaev *et al.* [8] and is generally consistent with data from molecular dynamics simulations of chromatin fibres [20]. In modelling technical noise, we assumed it to be reflected in the numbers of trans-chromosomal interactions involving the same fragment. A similar strategy has been applied independently in a recently published Capture Hi-C study [6]; the same authors also proposed an iterative correction algorithm for Capture Hi-C data [7] (software not publicly released) that may complement the approaches taken here.

Multiple testing issues are important in genomic analyses and, in attempting to address these issues, a number of bespoke approaches have been developed [22, 33]. The specific challenge of multiple testing in Hi-C data is that we expect the fractions of true positives to vary depending on the genomic distance between the fragments; in fact, the majority of tests are performed with interactions spanning large distances or spanning different chromosomes, where true positive signals are least expected. CHiCAGO’s multiple testing procedure is based on the p-value weighting approach by Genovese *et al.* [14], which is a generalisation of a segment-wise weighting procedure by Sun *et al.* [34]. These approaches have been used successfully to incorporate prior knowledge in genome-wide association studies [35–37]. In using the reproducibility of significant calls across replicates as an estimate of the relative true positive rate, we have taken inspiration from the irreproducible discovery rate (IDR) approach [38] used to determine peak signal thresholds in other types of genomics data, such as ChIP-seq.



Note that, in this setting, IDR cannot be used verbatim for choosing signal thresholds, as the relationship between Capture Hi-C signal and reproducibility does not satisfy IDR assumptions (not shown), likely because of undersampling issues. Importantly, we also found that conventional false discovery rate (FDR-) based approaches for multiple testing correction [39] are unsuitable for these data. Indeed, CHi-C observations (read-pair counts) are discrete and many of them are equal to either zero or one. This leads to a highly non-uniform distribution of p-values under the null, violating the basic assumption of conventional FDR approaches. The “soft-thresholding” approach used in CHiCAGO shifts the  $-\log$ -weighted p-values such that non-zero scores correspond to observations, where the evidence for an interaction exceeds that for a pair of near-adjacent fragments with no reads. More robust thresholds can then be chosen based on custom criteria, such as maximising enrichment of promoter-interacting fragments for chromatin features (**Fig. 6**; a user-friendly function for this analysis is provided as part of the Chicago R package - see the package vignette provided as **Additional file 3**). Based on this approach, we chose a signal threshold of 5 for our own analyses. However, we find the whole range of non-zero scores useful in other contexts, such as clustering interactions with respect to their scores in multiple samples.

The p-value weighting approach used here is similar in spirit to an empirical Bayesian treatment, with the p-value weights related, but not identical, to prior probabilities. Bayesian approaches are widely used, and the Bayes factors and posterior probabilities they generate are potentially more intuitive than weighted p-values. However, the p-value weighting approach used here has the advantage of not making any specific assumptions of the read distribution of “true interactions”, beyond their having a larger mean. Both approaches open the opportunity of incorporating prior knowledge, beyond the dependence of reproducibility on distance - for example, taking into account the boundaries of topologically associated domains (TADs [40]). We choose not to do this currently, because the exact relationship between these genomic properties and looping interactions still requires further investigation, and incorporating these relationships *a priori* prevents their investigation in post-hoc analyses. Active research in this area suggests that much more will be known about the determinants of loop formation in the near future, enabling a more extensive use of prior knowledge in interaction detection, potentially with a formal Bayesian treatment.

The downstream analyses of CHiCAGO results provided in this paper confirm the enrichment of promoter-interacting regions for regulatory features and disease-associated variants. These results demonstrate the enormous potential of Capture Hi-C for both functional genomics and population genetics, and this assay will likely be applied in multitudes of other cell types in the near future. Therefore, user-friendly, open-source software for robust signal detection in these challenging data will be a welcome addition to the toolkits of many bioinformaticians and experimentalists alike. We have developed CHiCAGO with the view of addressing this need. Furthermore, we expect the statistical foundations of CHiCAGO, and particularly the convolution noise model and the multiple testing procedure, to be potentially useful in a broader range of Hi-C-related assays.



## CONCLUSIONS

The publicly available, open-source CHiCAGO pipeline presented here [41] produces robust and interpretable interaction calls in Capture Hi-C data. Promoter-interacting fragments identified using this algorithm are enriched for active chromatin features, GWAS SNPs and regions capable of driving transgene expression, indicative of regulatory looping interactions. While developed specifically for Capture Hi-C, the statistical principles of CHiCAGO are potentially applicable to other Hi-C-based methods.

## MATERIALS AND METHODS

### *Sample pre-processing*

The publicly available HiCUP pipeline (Wingett *et al.*, manuscript in preparation; [42]) was used to process the raw sequencing reads. This pipeline was used to map the read pairs against the mouse (mm9) and human (hg19) genomes, to filter experimental artefacts (such as circularized reads and re-ligations), and to remove duplicate reads. The resulting BAM files were processed into CHiCAGO input files, retaining only those read pairs that mapped, at least on one end, to a captured bait. The script `bam2chicago.sh`, used for this purpose, is available as part of the `chicagoTools` suite [41].

### *The CHiCAGO algorithm*

A full description of the algorithm is given in **Additional file 1**. A tutorial on using the CHiCAGO package (the “vignette”) is provided in **Additional file 3**.

Briefly, to combine replicates, a “reference” replicate is created by taking the geometric mean of each fragment pair’s count across samples. Sample size factors are calculated by taking the mean ratio to the “reference” replicate, in a manner similar to the sample normalisation strategy implemented in DESeq [43]. Final counts are derived as the weighted sum of counts across replicates, where the weights are the sample size factors.

The Brownian noise count is assumed to have a Negative Binomial distribution, with mean  $s_i f(d_{ij})$  and dispersion  $r$ , where  $i$  indexes over other ends and  $j$  indexes over baits. Estimation of  $s_i$ ,  $s_j$ ,  $f(d)$  and  $r$  is performed in “proximal bins” - by default, 20kb bins that span the first 1.5mb around each bait.  $f(d)$  is estimated as follows:

- For each bait, take all of the other ends in a distance bin to get a mean count for that bin.
- $f(d)$  is estimated in a distance bin by taking the geometric mean of the bin counts at that distance, across all baits.
- To interpolate  $f(d)$  from these point estimates, we use a cubic fit on a log-log scale. Outside of this distance range, we extrapolate linearly, assuming continuity of  $f$  and its first derivative.
- $s_j$  is estimated by considering each mean bin count divided by  $f(d)$ , then taking the median of this ratio, across all bins associated with a bait.  $s_i$  is estimated similarly, but with the other ends pooled together (the pools are chosen such that their content ends have similar numbers of trans counts) so that there is enough information for a

precise estimate. The dispersion,  $r$ , is estimated using standard maximum likelihood methods.

The technical noise is assumed to have Poisson distribution, with mean  $\lambda_{ij}$ .  $\lambda_{ij}$  is estimated from trans counts - again, first pooling fragments by the number of trans counts they exhibit. Specifically, to estimate the technical noise level for a putative interaction between a bait in pool A and an other end in pool B, we count the number of interactions that span between pools A and B, and divide this by  $|A||B|$ , the total number of bait-other end fragment pairs from those pools.

P-values are called with a Delaporte model, representing the sum of two variables: a Negative Binomial variable with mean  $s; s; f(d_{ij})$  and dispersion  $r$ , and a Poisson variable with mean  $\lambda_{ij}$ . A four-parameter bounded logistic regression model is assumed for p-value weighting (see next section and **Additional file 1** for more information).

The final CHiCAGO score is obtained from soft-thresholding the  $-\log(\text{weighted p-value})$ . Specifically, the score is  $\max(-\log(p) + \log(w) - \log(w_{\max}), 0)$ , where  $w_{\max}$  is the maximum attainable weight, corresponding to zero distance. For the downstream analyses in this paper, interactions with CHiCAGO scores  $\geq 5$  were considered as “significant interactions”.

### ***P-value weighting parameter estimation***

The p-value weighting function has four parameters:  $\alpha$ ,  $\beta$ ,  $\gamma$ , and  $\delta$  (full details are given in **Additional file 1**). We can estimate these parameters from a candidate data set, provided that it has multiple biological replicates, as follows. We split the data into subsets that contain approximately equal numbers of baits. (By default, 5 subsets are used.) The reproducible interactions are defined as those where the stringent threshold of  $\log(p) < -10$  is passed in all biological replicates. Now, for each subset, we take a series of genomic distance bins (with the default breaks occurring at 0, 31.25k, 62.5k, 125k, 250k, 500k, 1m, 2m, 3m, 4m, ..., 16m), and we calculate the proportion of reproducible interactions out of the total number of possible interactions. The maximum likelihood estimates are calculated for each model parameter, using standard optimization methods [44]. Final parameter estimates are obtained by taking the median across the estimates from each subset. The two replicates of mESCs data were used for estimating weights. For GM12878, the first replicate was discarded as it led to unstable estimation, likely due to the poorer quality of this replicate compared with the other two, consistent with its higher cis/trans read-pair ratios (data not shown).

### ***Assessment of feature enrichment***

We computed how many other ends in the interactome overlap with a set of genomic features. In order to determine how these numbers compared to what would be expected if the presence of an interaction had no effect on the overlap, we performed a permutation test. A random set of promoter-other end pairs that were not detected as interacting was drawn such that the distance between them matched that of the significant interactions. (This was achieved by binning the distance distribution of significant interactions and drawing the random pairs per distance bin). The number of the “other ends” of these distance-matched

random pairs overlapping with the feature of interest was taken as expected overlap. A 95% confidence interval for the expected overlap was obtained from 100 random draws.

### ***The Chicago R package***

CHiCAGO was implemented as a package for the statistical environment R [45] taking advantage of the `data.table` objects [46] to optimise for both speed and memory. The fully-documented R package “Chicago” and the tutorial data package “PCHiCdata” are publicly available [41] and have been submitted to Bioconductor [47]. A documented set of supplementary scripts (`chicagoTools`) for data pre- and post-processing and running Chicago in batch mode can be found at the same location. A typical Chicago job for two biological replicates of CHi-C data takes 2-3 h wall-clock time (including sample pre-processing from bam files) and uses 50G RAM. An example workflow in the form of an R package vignette is provided as **Additional file 3**.

### ***Data access***

Raw CHi-C data for GM12878 and mESC is available in ArrayExpress [48, 49] under accession numbers E-MTAB-2323 and E-MTAB-2414, respectively. Capture design files, HindIII digest maps and CHiCAGO-detected significant interactions for GM12878 and mESC will be made publicly available prior to paper release.

### **AUTHORS’ CONTRIBUTIONS**

JC, PFP and MS designed the CHiCAGO algorithm; VP and DZ contributed statistical advice; JC, PFP, SWW and MS implemented the algorithm. SS, CO, BMJ and PF generated Capture Hi-C data and advised on their biological properties. PFP, AD and JC performed downstream validation analyses. JC, PFP and MS wrote the paper with critical input from all authors. MS supervised the work.

### **ACKNOWLEDGEMENTS**

The authors would like to thank Simon Andrews, Chris Wallace, Oliver Burren, and all members of the Spivakov, Fraser and Babraham Bioinformatics groups for helpful discussions. We are grateful to all our “wet-lab” collaborators (in particular, Mayra Furlan-Magaril, Mattia Frontini, Peter Rugg-Gunn and Willem Ouwehand) for using and testing CHiCAGO. This work has been funded by the Biotechnology and Biological Sciences Research Council and the Medical Research Council of the UK; DZ is funded by the European Molecular Biology Laboratory. Finally, we thank Laura Biggins for disambiguating the last two letters of CHiCAGO.

### **COMPETING INTERESTS**

The authors declare that they have no competing interests.

## ADDITIONAL FILES

Additional file 1: The mathematical specification of the CHiCAGO algorithm.

Additional file 2: Supplementary figures 1 and 2.

Additional file 3: The CHiCAGO R package tutorial.

## REFERENCES

1. Dekker J, Marti-Renom MA, Mirny LA: **Exploring the three-dimensional organization of genomes: interpreting chromatin interaction data.** *Nat Rev Genet* 2013, **14**:390-403.
2. van Steensel B, Dekker J: **Genomics tools for unraveling chromosome architecture.** *Nat Biotechnol* 2010, **28**:1089-1095.
3. Mifsud B, Tavares-Cadete F, Young AN, Sugar R, Schoenfelder S, Ferreira L, Wingett SW, Andrews S, Grey W, Ewels PA, et al: **Mapping long-range promoter contacts in human cells with high-resolution capture Hi-C.** *Nat Genet* 2015, **47**:598-606.
4. Schoenfelder S, Furlan-Magaril M, Mifsud B, Tavares-Cadete F, Sugar R, Javierre BM, Nagano T, Katsman Y, Sakthidevi M, Wingett SW, et al: **The pluripotent regulatory circuitry connecting promoters to their long-range interacting elements.** *Genome Res* 2015, **25**:582-597.
5. Schoenfelder S, Sugar R, Dimond A, Javierre BM, Armstrong H, Mifsud B, Dimitrova E, Matheson L, Tavares-Cadete F, Furlan-Magaril M, et al: **Polycomb repressive complex PRC1 spatially constrains the mouse embryonic stem cell genome.** *Nat Genet* 2015.
6. Dryden NH, Broome LR, Dudbridge F, Johnson N, Orr N, Schoenfelder S, Nagano T, Andrews S, Wingett S, Kozarewa I, et al: **Unbiased analysis of potential targets of breast cancer susceptibility loci by Capture Hi-C.** *Genome Res* 2014, **24**:1854-1868.
7. Jager R, Migliorini G, Henrion M, Kandaswamy R, Speedy HE, Heindl A, Whiffin N, Carnicer MJ, Broome L, Dryden N, et al: **Capture Hi-C identifies the chromatin interactome of colorectal cancer risk loci.** *Nat Commun* 2015, **6**:6178.
8. Imakaev M, Fudenberg G, McCord RP, Naumova N, Goloborodko A, Lajoie BR, Dekker J, Mirny LA: **Iterative correction of Hi-C data reveals hallmarks of chromosome organization.** *Nat Methods* 2012, **9**:999-1003.
9. Sanyal A, Lajoie BR, Jain G, Dekker J: **The long-range interaction landscape of gene promoters.** *Nature* 2012, **489**:109-113.
10. Yaffe E, Tanay A: **Probabilistic modeling of Hi-C contact maps eliminates systematic biases to characterize global chromosomal architecture.** *Nat Genet* 2011, **43**:1059-1065.
11. Sahlen P, Abdullayev I, Ramskold D, Matskova L, Rilakovic N, Lotstedt B, Albert T, Lundeberg J, Sandberg R: **Genome-wide mapping of promoter-anchored interactions with close to single-enhancer resolution.** *Genome Biology* 2015, **16**:156.
12. van de Werken HJ, Landan G, Holwerda SJ, Hoichman M, Klous P, Chachik R, Splinter E, Valdes-Quezada C, Oz Y, Bouwman BA, et al: **Robust 4C-seq data analysis to screen for regulatory DNA interactions.** *Nat Methods* 2012, **9**:969-972.
13. Klein FA, Pakozdi T, Anders S, Ghavi-Helm Y, Furlong EE, Huber W: **FourCSeq: analysis of 4C sequencing data.** *Bioinformatics* 2015.
14. Genovese CR, Roeder K, Wasserman L: **False discovery control with p-value weighting.** *Biometrika* 2006, **93**:509-524.

15. Zhou X, Lowdon RF, Li D, Lawson HA, Madden PA, Costello JF, Wang T: **Exploring long-range genome interactions using the WashU Epigenome Browser.** *Nat Methods* 2013, **10**:375-376.
16. **WashU Epigenome Browser** [<http://epigenomegateway.wustl.edu>]
17. Ernst J, Kellis M: **ChromHMM: automating chromatin-state discovery and characterization.** *Nat Meth* 2012, **9**:215-216.
18. Ay F, Bailey TL, Noble WS: **Statistical confidence estimation for Hi-C data reveals regulatory chromatin contacts.** *Genome Res* 2014, **24**:999-1011.
19. Thongjuea S, Stadhouders R, Grosveld FG, Soler E, Lenhard B: **r3Cseq: an R/Bioconductor package for the discovery of long-range genomic interactions from chromosome conformation capture and next-generation sequencing data.** *Nucleic Acids Res* 2013, **41**:e132.
20. Rosa A, Becker NB, Everaers R: **Looping Probabilities in Model Interphase Chromosomes.** *Biophys J* 2010, **98**:2410-2419.
21. Bohn M, Heermann DW: **Diffusion-driven looping provides a consistent framework for chromatin organization.** *PLoS One* 2010, **5**:e12218.
22. Gui J, Tosteson T, Borsuk M: **Weighted multiple testing procedures for genomic studies.** *BioData Mining* 2012, **5**:4.
23. Ong C-T, Corces VG: **CTCF: an architectural protein bridging genome topology and function.** *Nat Rev Genet* 2014, **15**:234-246.
24. ENCODE consortium: **An integrated encyclopedia of DNA elements in the human genome.** *Nature* 2012, **489**:57-74.
25. Yue F, Cheng Y, Breschi A, Vierstra J, Wu W, Ryba T, Sandstrom R, Ma Z, Davis C, Pope BD, et al: **A comparative encyclopedia of DNA elements in the mouse genome.** *Nature* 2014, **515**:355-364.
26. Maurano MT, Humbert R, Rynes E, Thurman RE, Haugen E, Wang H, Reynolds AP, Sandstrom R, Qu H, Brody J, et al: **Systematic localization of common disease-associated variation in regulatory DNA.** *Science* 2012, **337**:1190-1195.
27. Trynka G, Westra H-J, Slowikowski K, Hu X, Xu H, Stranger Barbara E, Klein Robert J, Han B, Raychaudhuri S: **Disentangling the Effects of Colocalizing Genomic Annotations to Functionally Prioritize Non-coding Variants within Complex-Trait Loci.** *The American Journal of Human Genetics* 2015, **97**:139-152.
28. Akhtar W, de Jong J, Pindyurin AV, Pagie L, Meuleman W, de Ridder J, Berns A, Wessels LF, van Lohuizen M, van Steensel B: **Chromatin position effects assayed by thousands of reporters integrated in parallel.** *Cell* 2013, **154**:914-927.
29. Sexton T, Umlauf D, Kurukuti S, Fraser P: **The role of transcription factories in large-scale structure and dynamics of interphase chromatin.** *Semin Cell Dev Biol* 2007, **18**:691-697.
30. Ma T, Van Tine BA, Wei Y, Garrett MD, Nelson D, Adams PD, Wang J, Qin J, Chow LT, Harper JW: **Cell cycle-regulated phosphorylation of p220(NPAT) by cyclin E/Cdk2 in Cajal bodies promotes histone gene transcription.** *Genes Dev* 2000, **14**:2298-2313.
31. Mifsud B, Martincorena I, Darbo E, Sugar R, Schoenfelder S, Fraser P, Luscombe N: **GOTHIC, a simple probabilistic model to resolve complex biases and to identify real interactions in Hi-C data.** *bioRxiv preprint* 2015:10.1101/023317.
32. Hu M, Deng K, Selvaraj S, Qin Z, Ren B, Liu JS: **HiCNorm: removing biases in Hi-C data via Poisson regression.** *Bioinformatics* 2012, **28**:3131-3133.
33. Dudoit S, van der Laan MJ: *Multiple testing procedures with applications to genomics.* New York: Springer; 2008.
34. Sun L, Craiu RV, Paterson AD, Bull SB: **Stratified false discovery control for large-scale hypothesis testing with application to genome-wide association studies.** *Genet Epidemiol* 2006, **30**:519-530.
35. Lin WY, Lee WC: **Improving power of genome-wide association studies with weighted false discovery rate control and prioritized subset analysis.** *PLoS One* 2012, **7**:e33716.



36. Roeder K, Wasserman L: **Genome-Wide Significance Levels and Weighted Hypothesis Testing**. *Stat Sci* 2009, **24**:398-413.
37. Li L, Kabesch M, Bouzigon E, Demenais F, Farrall M, Moffatt MF, Lin X, Liang L: **Using eQTL weights to improve power for genome-wide association studies: a genetic study of childhood asthma**. *Front Genet* 2013, **4**.
38. Li Q, Brown JB, Huang H, Bickel PJ: **Measuring reproducibility of high-throughput**. *Ann Appl Stat* 2011, **5**:1752--1779.
39. Benjamini Y, Hochberg Y: **Controlling the False Discovery Rate: A Practical and Powerful Approach to Multiple Testing**. *Journal of the Royal Statistical Society Series B (Methodological)* 1995, **57**:289-300.
40. Dixon JR, Selvaraj S, Yue F, Kim A, Li Y, Shen Y, Hu M, Liu JS, Ren B: **Topological domains in mammalian genomes identified by analysis of chromatin interactions**. *Nature* 2012, **485**:376-380.
41. **The CHiCAGO home page** [<http://www.regulatorygenomicsgroup.org/chicago>]
42. **HiCUP** [<http://www.bioinformatics.babraham.ac.uk/projects/hicup/overview/>]
43. Anders S, Huber W: **Differential expression analysis for sequence count data**. *Genome Biol* 2010, **11**:R106.
44. Nelder JA, Mead R: **A Simplex Method for Function Minimization**. *The Computer Journal* 1965, **7**:308-313.
45. R Development Core Team: **R: A Language and Environment for Statistical Computing**. R Foundation for Statistical Computing; 2010.
46. **data.table: Extension of data.frame** [<http://CRAN.R-project.org/package=data.table>]
47. Huber W, Carey VJ, Gentleman R, Anders S, Carlson M, Carvalho BS, Bravo HC, Davis S, Gatto L, Girke T, et al: **Orchestrating high-throughput genomic analysis with Bioconductor**. *Nat Meth* 2015, **12**:115-121.
48. **ArrayExpress – functional genomics data** [<https://www.ebi.ac.uk/arrayexpress/>]
49. Kolesnikov N, Hastings E, Keays M, Melnichuk O, Tang YA, Williams E, Dylag M, Kurbatova N, Brandizi M, Burdett T, et al: **ArrayExpress update—simplifying data submissions**. *Nucleic Acids Research* 2015, **43**:D1113-D1116.
